# Supplementary material for: Indication of a twist-grain-boundary-twist-bend phase of flexible core bent-shape chiral dimers
Source: Royal Society of Chemistry journal article supplement (doi:10.1039/c8sm02338g), 2019-01-01
Supplement: c8sm02338g1.pdf [file c8sm02338g1.pdf]

## Supporting Information

### Indication of a Twist-Grain-Boundary-Twist-Bend Phase of Flexible Core Bent-shape Chiral Dimers

Matthew T. Murachver,<sup>a</sup> Ahlam Nemati,<sup>a</sup> Mirosław Salamończyk,<sup>aef</sup> Carson Bullock,<sup>ab</sup> Zachary Sabata,<sup>acd</sup> Haumed Rahmani,<sup>a</sup> Tetiana Vorobiova,<sup>a</sup> Alain Izadnegahdar,<sup>g</sup> Seyyed Muhammad Salili,<sup>ah</sup> Victoria Norman,<sup>e</sup> Chenhui Zhu,<sup>e</sup> Torsten Hegmann,<sup>ai</sup> Samuel N. Sprunt,<sup>j</sup> James T. Gleeson<sup>l</sup> and Antal I. Jakli<sup>\*aj</sup>

<sup>a</sup> Chemical Physics Interdisciplinary Program & Liquid Crystal Institute, Kent State University, Kent, OH 44242, USA.

<sup>b</sup> Department of Physics, College of Wooster, Wooster OH 44691, USA.

<sup>c</sup> Department of Physics, University of Nebraska, Omaha NE 68182, USA.

<sup>d</sup> Department of Chemistry, University of Nebraska, Omaha NE 68182, USA.

<sup>e</sup> Advanced Light Source, Lawrence Berkeley National Laboratory, Berkeley, California 94720, USA.

<sup>f</sup> current address: University of Warsaw, Faculty of Chemistry, Żwirki i Wigury 101, 02-089 Warszawa, Poland

<sup>g</sup> Advanced Precision Systems, Inc, Chagrin Falls, OH, USA.

<sup>h</sup> Department of Physics & Astronomy, University of Pennsylvania, Philadelphia, USA.

<sup>i</sup> Department of Chemistry and Biochemistry, Kent State University, Kent, OH 44242, USA

<sup>j</sup> Department of Physics, Kent State University, Kent, OH 44242, USA

\*Corresponding author: [ajakli@kent.edu](mailto:ajakli@kent.edu)

Molecular structure of the studied materials:

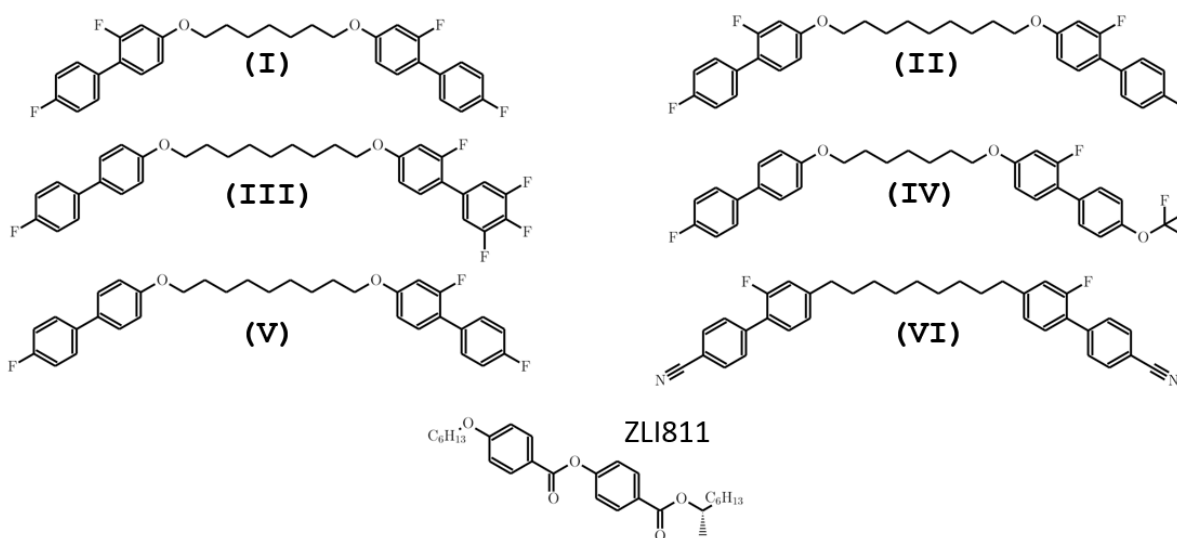

Figure S1: Molecular structures of the constituents of studied mixtures. KA(0.2) [i – vi] and chiral dopant ZLI811. The 6-component mixture of achiral dimers KA(0.2) exhibits  $N_{TB}$  phase upon cooling below the uniaxial nematic.

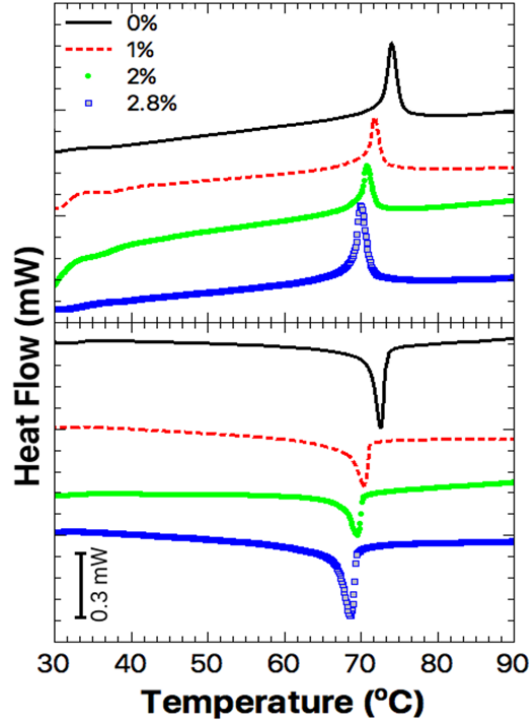

Figure S2: Differential scanning calorimetry (DSC) curves in heating (top) and cooling with  $5^{\circ}\text{C}/\text{min}$  rates.

|                                            | 0%             | 1%             | 2%             | 2.8%           |
|--------------------------------------------|----------------|----------------|----------------|----------------|
| $T_{\text{N-I}}$ (°C)/<br>$\Delta H$ (J/g) | 74.08<br>(2.4) | 71.84<br>(2.3) | 70.82<br>(1.9) | 69.90<br>(2.2) |
| $T_{\text{I-N}}$ (°C)/<br>$\Delta H$ (J/g) | 72.71<br>(2.5) | 70.42<br>(2.4) | 69.50<br>(2.3) | 68.46<br>(2.3) |

Table S1: Enthalpy of fusion measured by DSC in heating (top) and cooling (bottom).

The N- $N_{\text{TB}}$  transition of KA(0.2) and their mixtures with chiral additives are nearly of second order and our DSC was not sensitive to measure the enthalpy at this transition. Note that previous DSC measurements on several twist-bend nematogens have reported  $\frac{\Delta H_{\text{I-N}}}{\Delta H_{\text{N-N}_{\text{TB}}}} > 20$ <sup>1</sup> and  $2 \leq$

$$\frac{\Delta H_{\text{I-N}}}{\Delta H_{\text{N-N}_{\text{TB}}}} \leq 50$$
<sup>2</sup>.

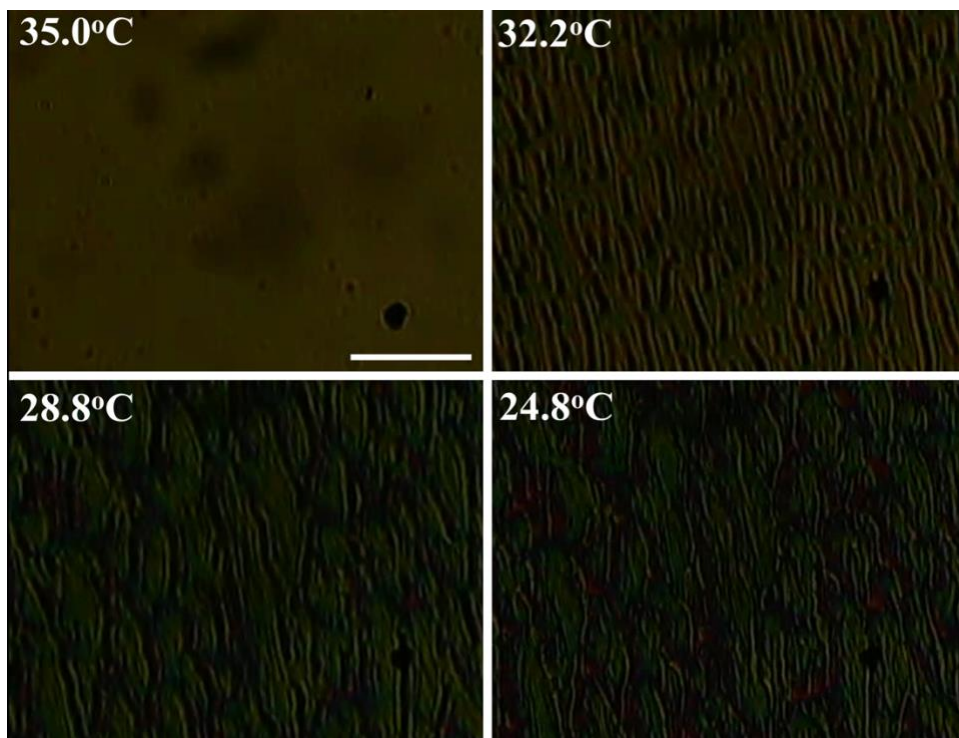

Figure S3: Typical textures seen in Polarized Optical Microscopy (POM) of 5 $\mu$ m thick film of KA(0.2) +1% ZLI811 at different temperatures. Bar shows 50 $\mu$ m length.

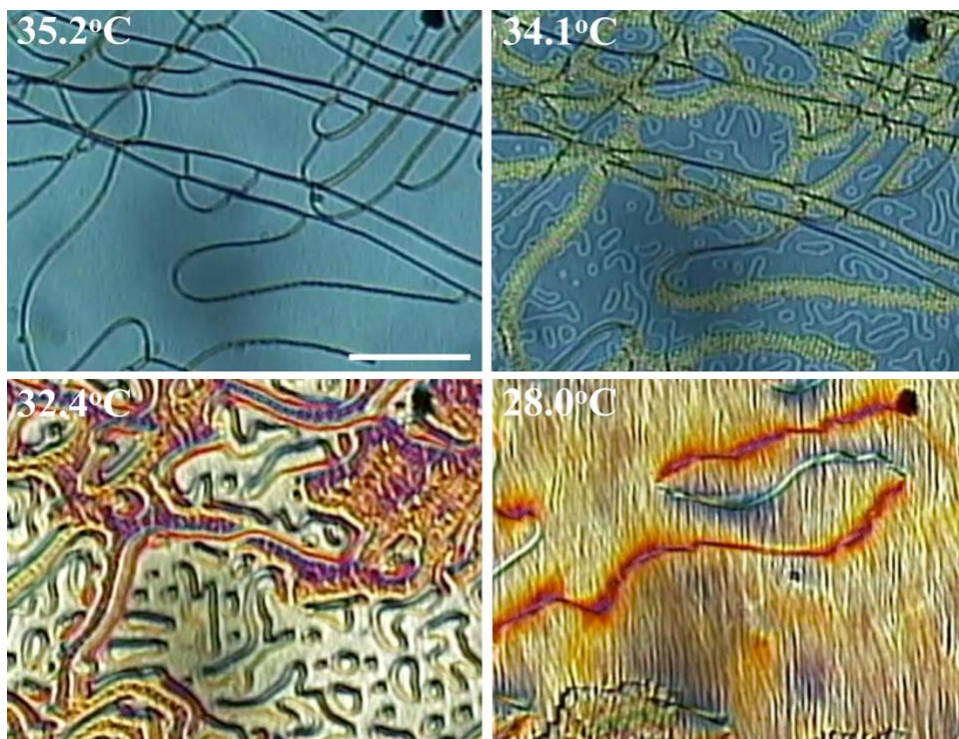

Figure S4: Typical textures seen in Polarized Optical Microscopy (POM) of 5 $\mu$ m thick film of KA(0.2) +2.5 % ZLI811 at different temperatures. Bar shows 50 $\mu$ m length.

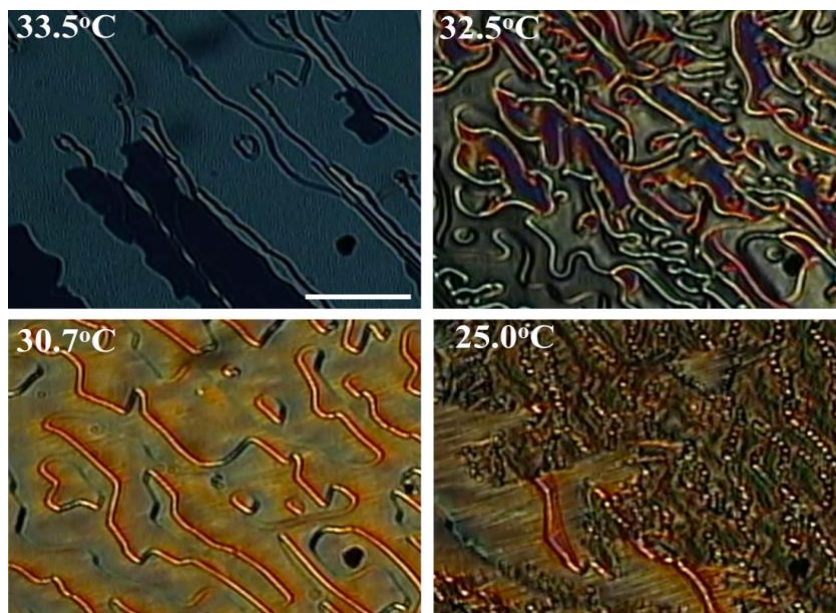

Figure S5: Typical textures seen in Polarized Optical Microscopy (POM) of  $5\mu\text{m}$  thick film of  $\text{KA}(0.2) + 3.5\%$  ZLI811 at different temperatures. Bar shows  $50\mu\text{m}$  length.

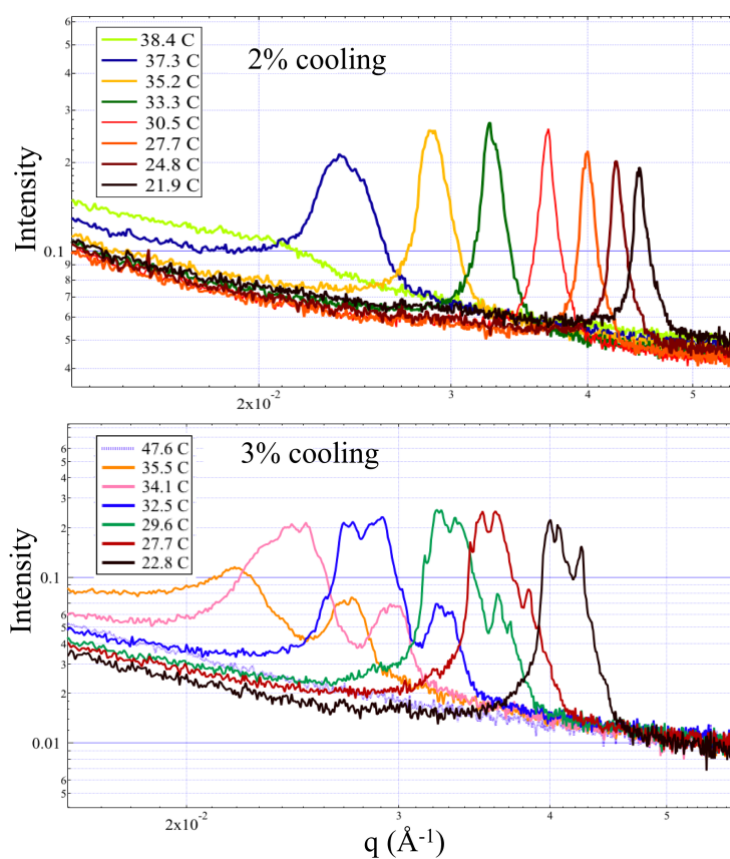

Figure S6: Intensity of RSoXS signals at the function of wavenumber  $q$  at 2% (top) and 3% ZLI811 concentrations.

With increasing chiral additive concentration the signal RSoXS exhibits a dramatic splitting which does not appear until 3% mixture. This may be interpreted as frustration in the twist-bend helix where by chiral additive ZLI811 fits favorably into helix of a single handedness causing the mirrored helix to extend to enable the chiral additive to be incorporated.

**References:**

- 1 D. A. Paterson, J. Xiang, G. Singh, R. Walker, M. Agra-Kooijman, A. Martínez-Felipe, M. Gao, J. M. D Storey, S. Kumar, O. D. Lavrentovich and C. T. Imrie, , DOI:10.1021/jacs.5b13331.
- 2 C. T. Archbold, R. J. Mandle, J. L. Andrews, S. J. Cowling and J. W. Goodby, *Liq. Cryst.*, 2017, **44**, 1–10.
